# Supplementary material for: Synergy Effect of Au and SiO2 Modification on SnO2 Sensor Properties in VOCs Detection in Humid Air
Source: PubMed Central journal article supplement (PMC7221567; doi:10.3390/nano10040813), 2020-04-23
Supplement: nanomaterials-10-00813-s001.pdf [file nanomaterials-10-00813-s001.pdf]

# Synergy Effect of Au and SiO<sub>2</sub> Modification on SnO<sub>2</sub> Sensor Properties in VOCs Detection in Humid Air

Dayana Gulevich <sup>1</sup>, Marina Rumyantseva <sup>1,\*</sup>, Evgeny Gerasimov <sup>2</sup>, Nikolay Khmelevsky <sup>3</sup>, Elena Tsvetkova <sup>4</sup> and Alexander Gaskov <sup>1</sup>

<sup>1</sup> Chemistry Department, Moscow State University, 119991 Moscow, Russia; dayana-nsu@mail.ru (D.G.); gaskov@inorg.chem.msu.ru (A.G.)

<sup>2</sup> Boreskov Institute of Catalysis SB RAS, 630090 Novosibirsk, Russia; gerasimov@catalysis.ru

<sup>3</sup> LISM, Moscow State Technological University Stankin, 127055 Moscow, Russia; khmelevsky@mail.ru

<sup>4</sup> Bauman Moscow State Technical University, 105005 Moscow, Russia; flowersova@mail.ru

\* Correspondence: roum@inorg.chem.msu.ru; Tel.: +7-495-939-5471

## Supplementary Information

The phase composition of sensitive materials was analyzed by X-ray diffraction on a DRON-4 diffractometer using monochromatic CuK $\alpha$  radiation ( $\lambda = 1.5406 \text{ \AA}$ ) in the range of  $2\theta = 5\text{--}60^\circ$  with  $0.1^\circ$  increment.

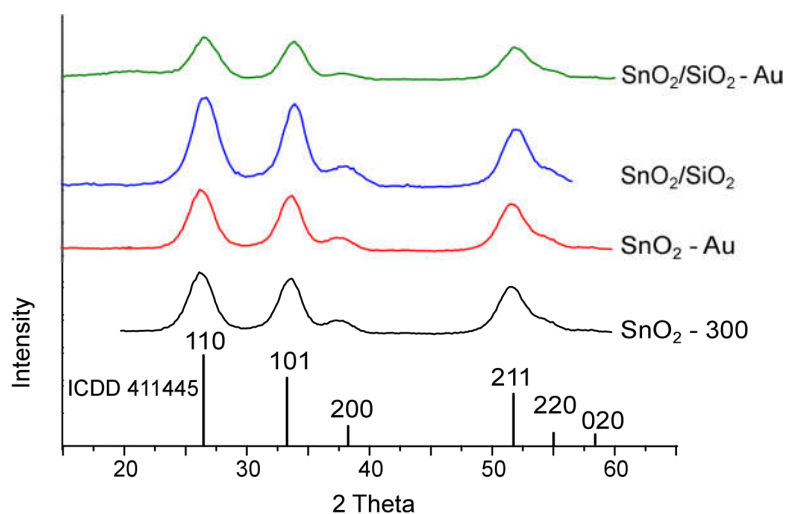

**Figure S1.** XRD patterns of nanocrystalline SnO<sub>2</sub>-300, SnO<sub>2</sub>-Au, SnO<sub>2</sub>/SiO<sub>2</sub> and SnO<sub>2</sub>/SiO<sub>2</sub>-Au.
